# Supplementary material for: Development and Validation of Novel HPLC Methods for Quantitative Determination of Vitamin D3 in Tablet Dosage Form
Source: MDPI journal article supplement (doi:10.3390/ph17040505), 2024-04-15
Supplement: s1 [file s1]

**<Supplementary materials>**

**Development and Validation of Novel HPLC Methods for Quantitative Determination of Vitamin D3  
in Tablet Dosage Form**

**Muhammad Saqib Gohar <sup>1</sup>, Taj Ur Rahman <sup>1</sup>, Ali Bahadur <sup>2</sup>, Ashraf Ali <sup>3,\*</sup>, Sarah Alharthi <sup>4,5</sup>  
and Nora Hamad Al-Shaalan <sup>6</sup>**

**Table S1: System suitability of the developed method.**

| <b>Replicates</b>  | <b>Peak Areas</b> |
|--------------------|-------------------|
| 1                  | 67433             |
| 2                  | 67286             |
| 3                  | 67455             |
| 4                  | 67238             |
| 5                  | 67218             |
| 6                  | 67173             |
| Mean               | 67301             |
| Standard deviation | 117               |
| RSD                | 0.1741            |

**Table S2: Precision repeatability of the developed method.**

| Replicate                   | Peak Area/Absorbance |
|-----------------------------|----------------------|
| Replicate 1                 | 67433                |
| Replicate 2                 | 67286                |
| Replicate 3                 | 67455                |
| Replicate 4                 | 67238                |
| Replicate 5                 | 67218                |
| Replicate 6                 | 67173                |
| Mean                        | 67301                |
| Standard Dev                | 117                  |
| Relative Standard dev (RSD) | 0.1741               |

**Table S3: Precision Ruggedness by different analyst variation of the developed method.**

| Analyst | Sample | Assay % | %RSD  |
|---------|--------|---------|-------|
| 1       | 1      | 98.82   | 0.144 |
|         | 2      | 98.56   |       |
|         | 3      | 98.60   |       |
| 2       | 1      | 98.57   | 0.028 |
|         | 2      | 98.54   |       |
|         | 3      | 98.60   |       |

**Table S4: Robustness of the developed method.**

| Flow rate                | Area  | SD  | %RSD |
|--------------------------|-------|-----|------|
| 2.4                      | 68031 | 551 | 0.81 |
| 2.5                      | 67206 |     |      |
| 2.6                      | 68250 |     |      |
| Mobile Phase composition | Area  | SD  | %RSD |
| 82:18                    | 66577 | 481 | 0.72 |
| 85:15                    | 67173 |     |      |
| 87:13                    | 67529 |     |      |

**Table S5: Limit of Detection LOD of the developed method.**

| Sample | Conc.<br>% | Conc.<br>mg/ml | Abs.  | Standard<br>Deviation | Slope   | Conc.<br>(ug/ml) at<br>LOD | Absorbance at<br>LOD |
|--------|------------|----------------|-------|-----------------------|---------|----------------------------|----------------------|
| 1      | 80         | 0.00607        | 53707 | 117                   | 7174221 | 0.0539                     | 482                  |
| 2      | 90         | 0.00675        | 60367 |                       |         |                            |                      |
| 3      | 100        | 0.0075         | 67078 |                       |         |                            |                      |
| 4      | 110        | 0.0082         | 73582 |                       |         |                            |                      |
| 5      | 120        | 0.0098         | 80315 |                       |         |                            |                      |

**Table S6: Limit of Quantification LOQ of the developed method.**

| Sample | Conc (%) | Conc.<br>mg/ml | Abs.  | Standard<br>Deviation | Slope   | Conc.<br>(ug/ml) at<br>LOQ | Absorbance at<br>LOQ |
|--------|----------|----------------|-------|-----------------------|---------|----------------------------|----------------------|
| 1      | 80       | 0.00607        | 53707 | 117                   | 7174221 | 0.1633                     | 1460                 |
| 2      | 90       | 0.00675        | 60367 |                       |         |                            |                      |
| 3      | 100      | 0.0075         | 67078 |                       |         |                            |                      |
| 4      | 110      | 0.0082         | 73582 |                       |         |                            |                      |
| 5      | 120      | 0.0098         | 80315 |                       |         |                            |                      |

**Table S7: Specificity Placebo Interference in the developed method.**

| Sample                 | Peak Area           |
|------------------------|---------------------|
| Aerosil USP            | No peak is detected |
| Ossein mineral complex | No peak is detected |
| Primojel BP            | No peak is detected |
| Mg Stearate BP         | No peak is detected |
| Starch                 | No peak is detected |

**Table S8: Specificity blank Interference in the developed method**

| Diluent                  | Peak Area                                                 |
|--------------------------|-----------------------------------------------------------|
| Diluent and mobile phase | No peak is detected at the range of $\lambda$ max 292 nm. |

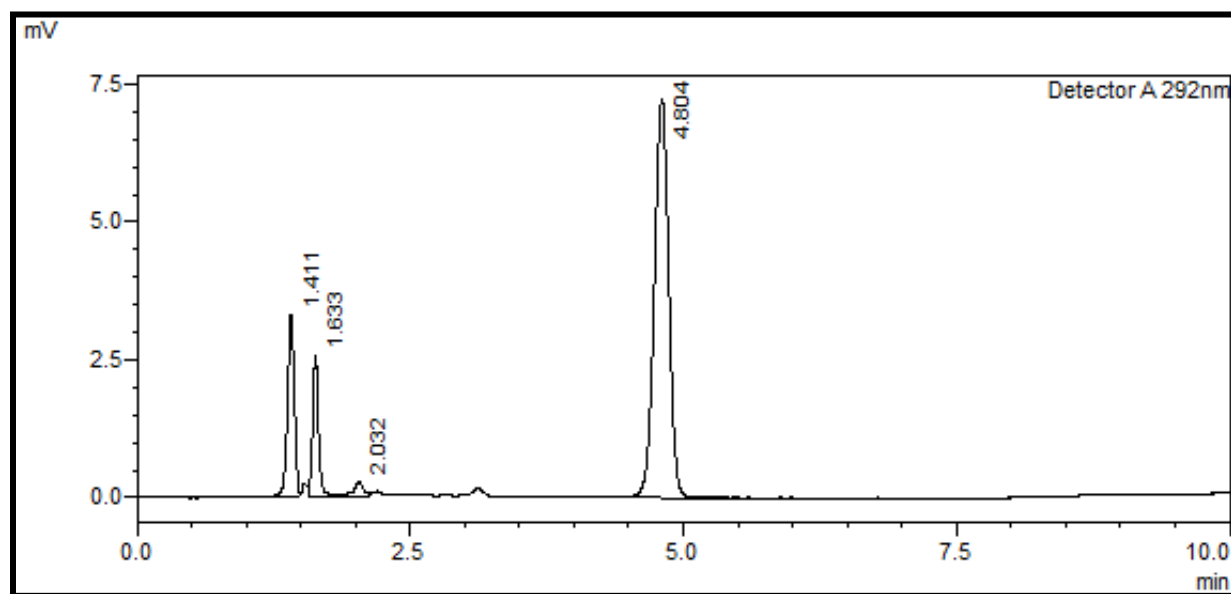

**Figure S1. Method precision (ruggedness) analyst variation**

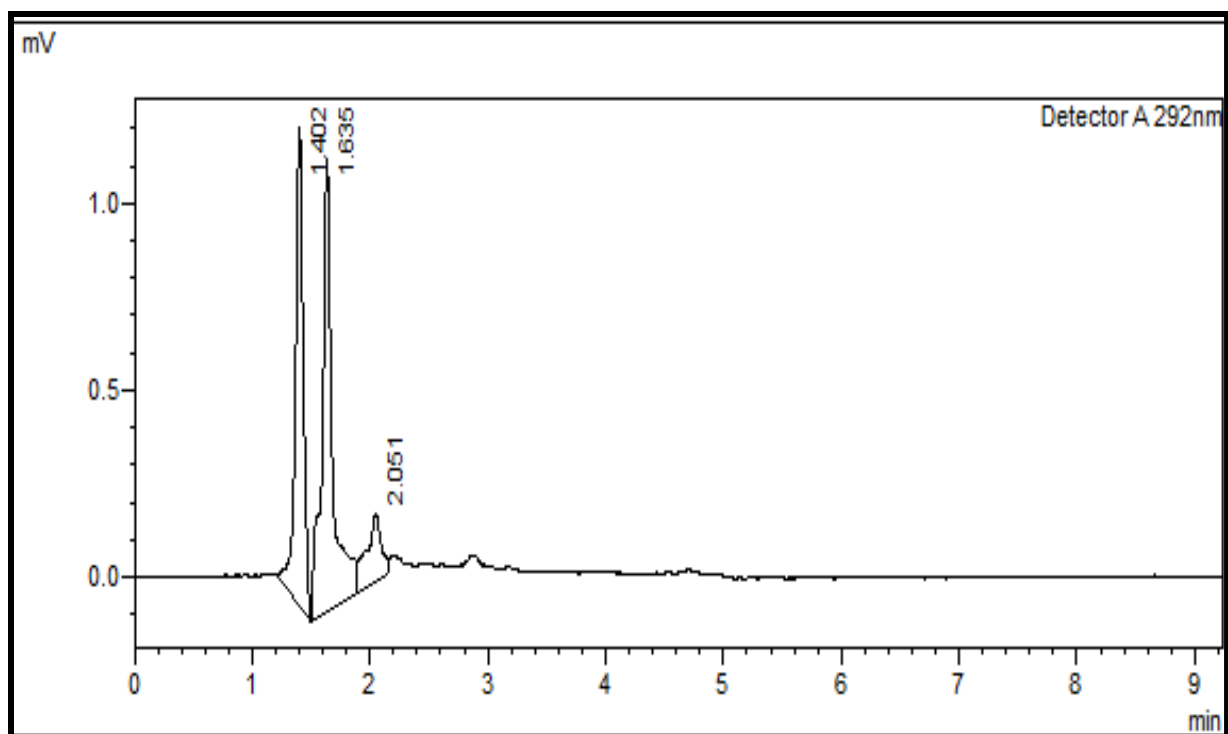

Figure S2: Specificity placebo interference.

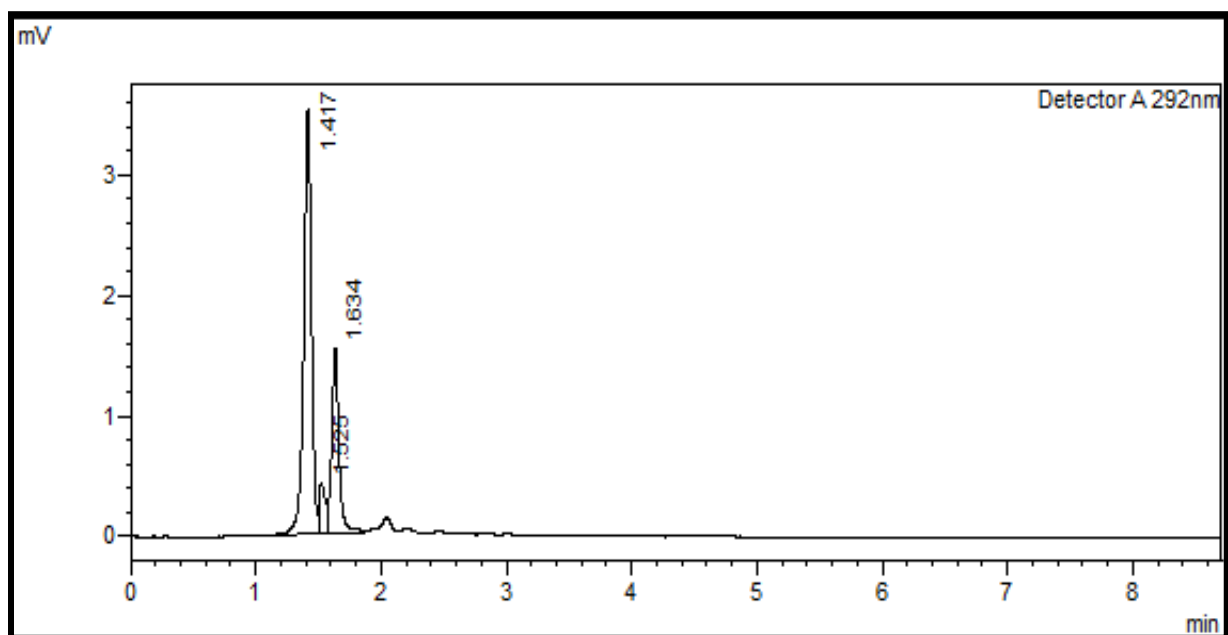

Figure S3: Specificity blank interference-diluent.

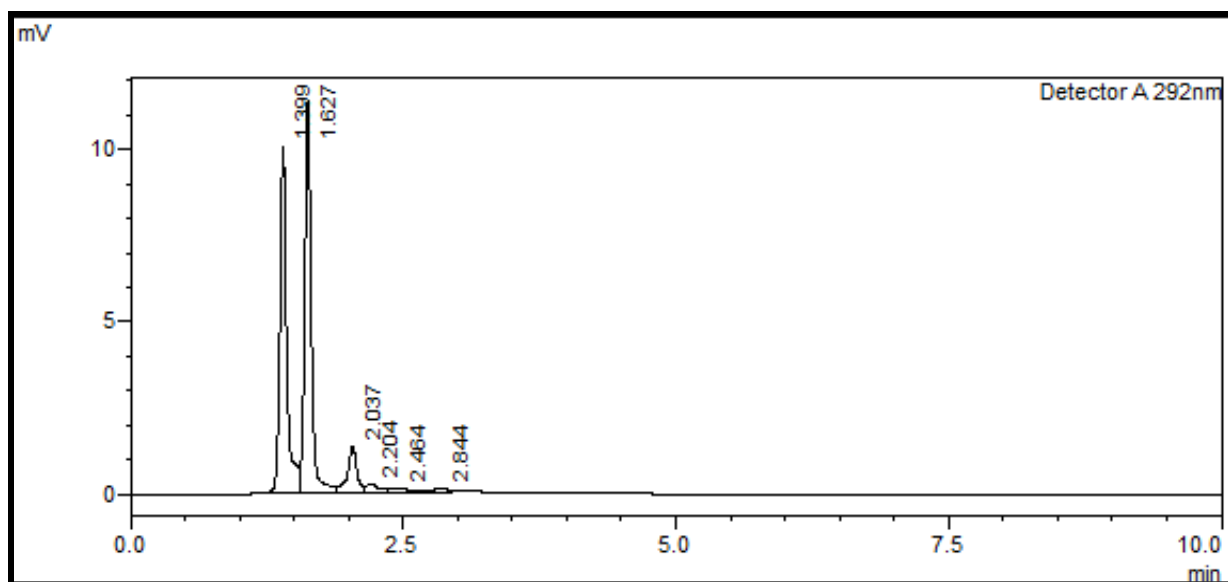

Figure S4. Specificity blank interference-mobile phase

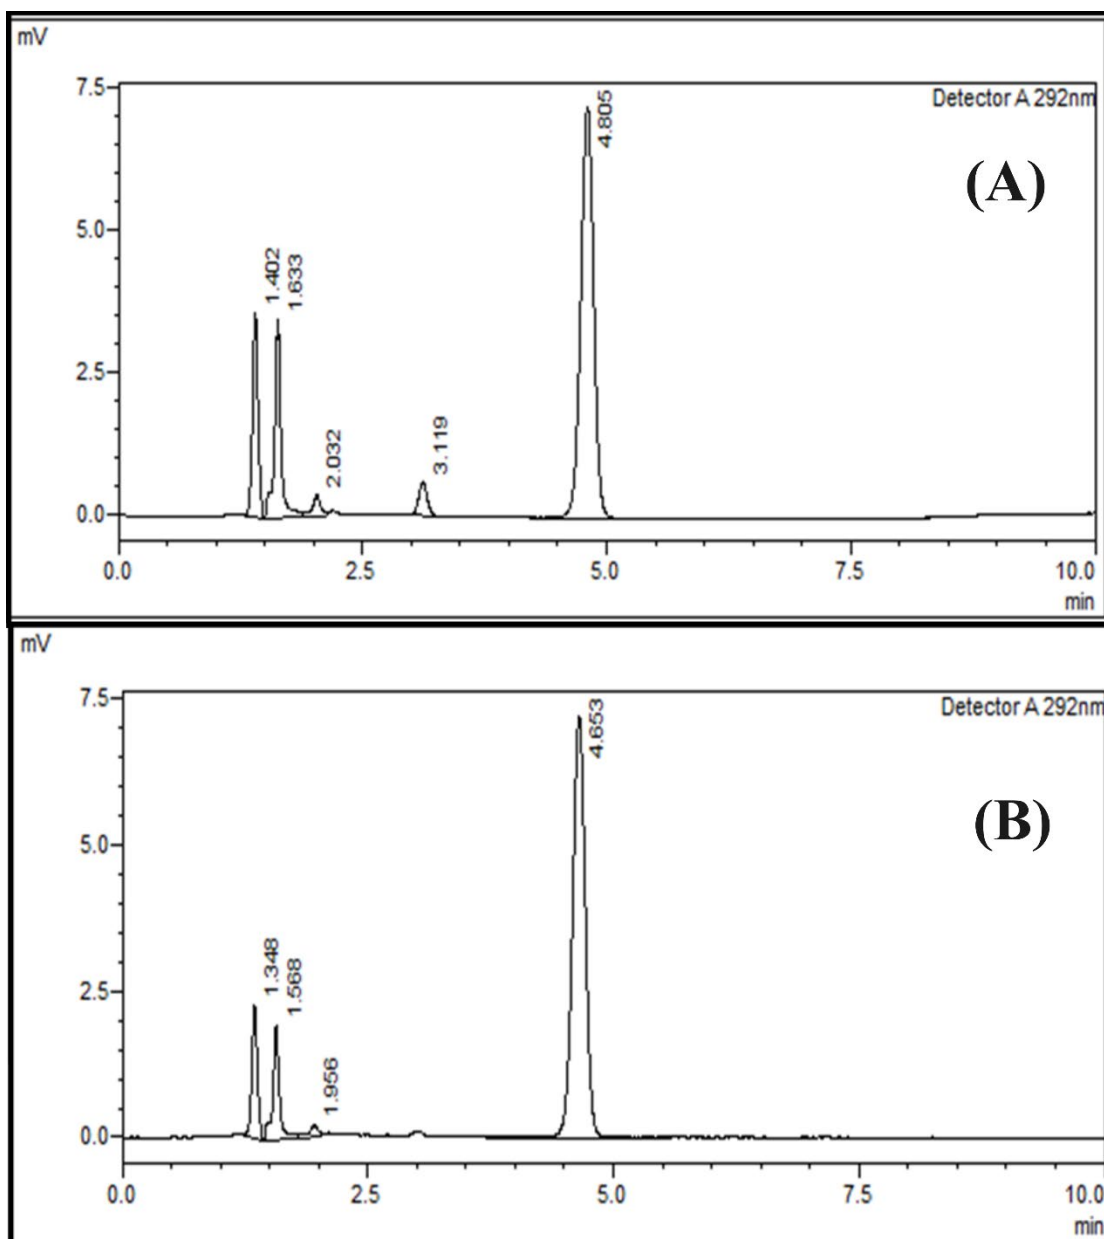

Figure S5. Method precision (robustness) at the flow rates 2.0 ml/min (A) and 2.5 ml/min (B).



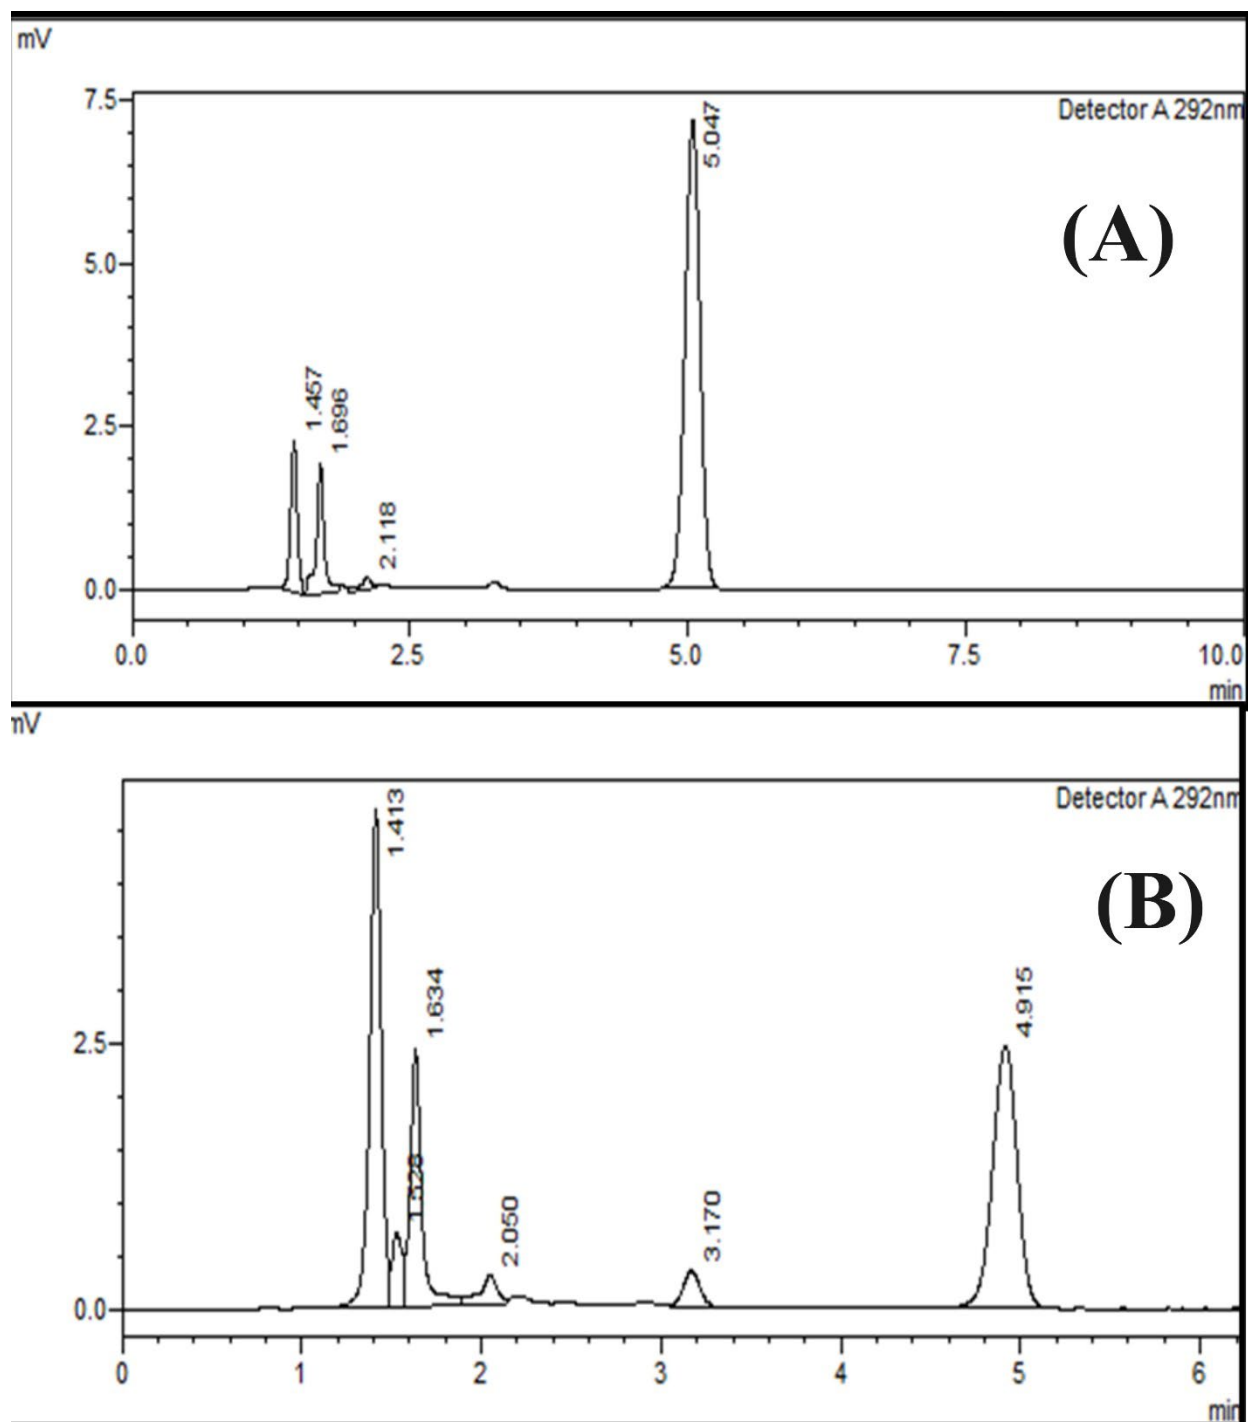

Figure S6. Robustness of the method (mobile phase (80:20) (A) and (90:10) (B)).
